# Supplementary material
Source: PubMed Central journal article supplement (PMC6638552)
Supplement: NIHMS1038952-supplement-Supplemental_figures.pdf [file NIHMS1038952-supplement-Supplemental_figures.pdf]

## Supporting Information

### Supplementary Figures

# **Fluidic force microscopy demonstrates that homophilic adhesion by *Candida albicans* Als proteins is mediated by amyloid bonds between cells**

Jérôme Dehullu<sup>1</sup>, Claire Valotteau<sup>1</sup>, Philippe Herman-Bausier<sup>1</sup>, Melissa Garcia-Sherman<sup>2</sup>, Maximilian Mittelviehhaus<sup>3</sup>, Julia A. Vorholt<sup>3</sup>, Peter N. Lipke<sup>2</sup>, and Yves F. Dufrêne<sup>1,4</sup>

<sup>1</sup>Institute of Life Sciences, Université catholique de Louvain, Croix du Sud, 4-5, bte L7.07.06, B-1348 Louvain-la-Neuve, Belgium

<sup>2</sup>Biology Department, City University of New York Brooklyn College, 2900 Bedford Avenue, Brooklyn, NY 11210 USA

<sup>3</sup>Institute of Microbiology, ETH Zurich, Vladimir-Prelog-Weg 1-5/10, 8093 Zurich, Switzerland

<sup>4</sup>Walloon Excellence in Life sciences and Biotechnology (WELBIO), Belgium

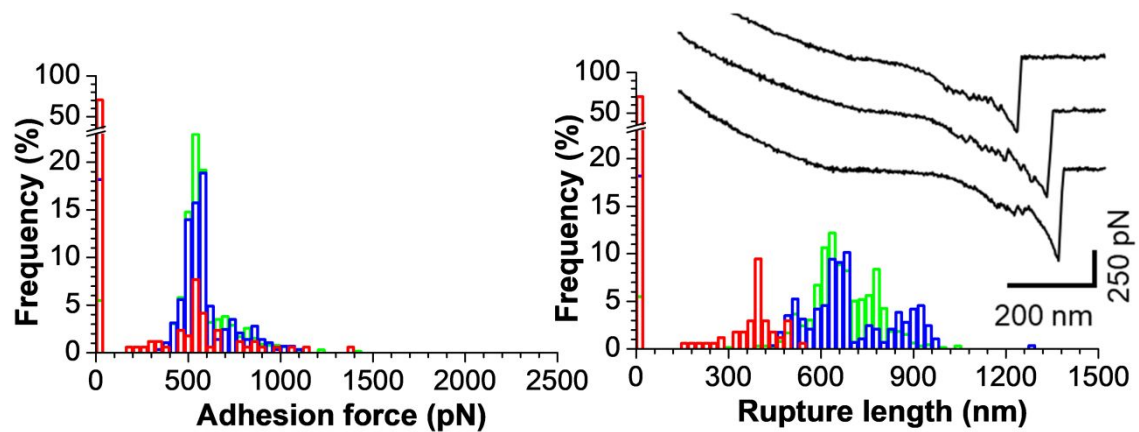

**Figure S1. FluidFM and conventional SCFS reveal similar adhesion forces.** Maximum adhesion force (left) and rupture length (right) histograms with representative retraction force profiles (insets) obtained by recording force-distance curves in PBS for three cell pairs of Als5 cells using SCFS with cantilevers coated with bioadhesives.

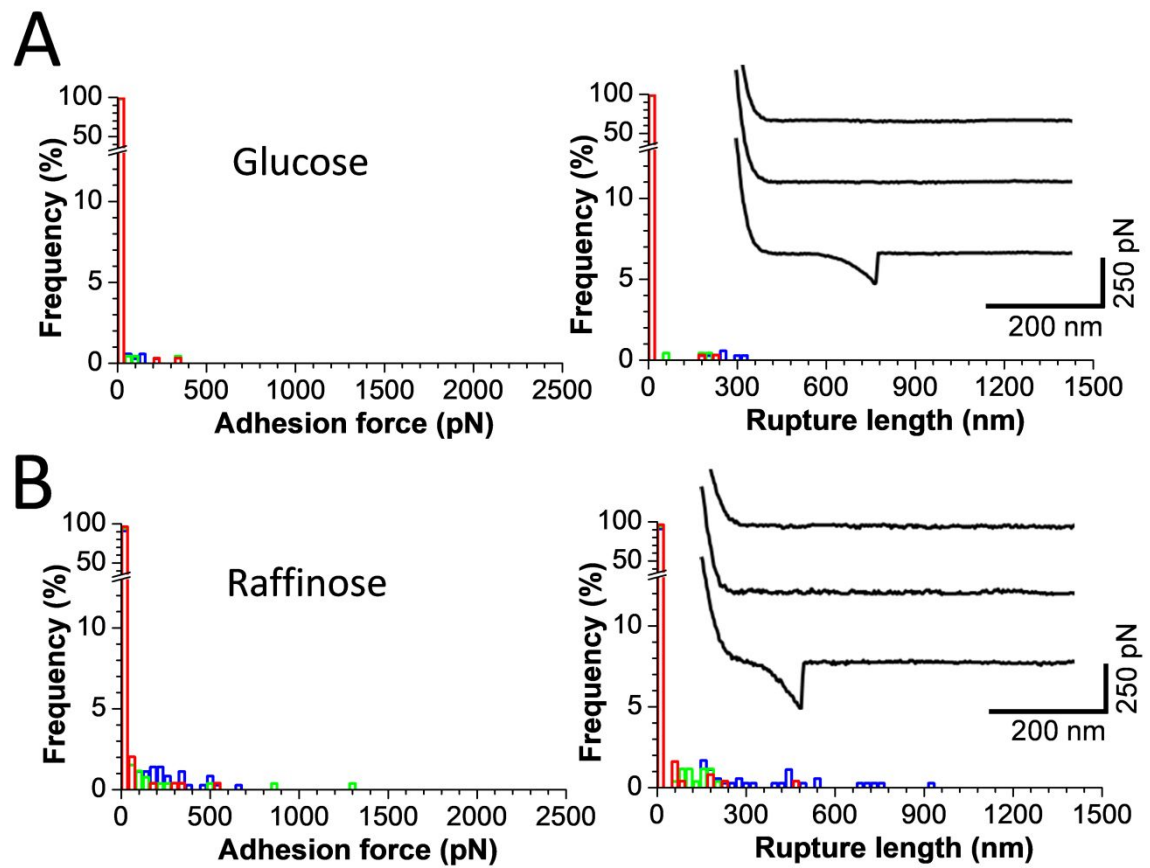

**Figure S2. Yeast-yeast adhesion forces strongly depend on Als5 density.** (A, B) Maximum adhesion force (left) and rupture length (right) histograms with representative retraction force profiles (insets) obtained by recording force-distance curves in PBS for three cell pairs of Als5 cells grown in glucose-rich (A) or raffinose-rich (B) conditions.
